# Supplementary material
Source: HighWire-hosted journal article supplement (https://connect.springerpub.com/content/15/1/2)
Supplement: inline-supplementary-material-1 [file inline-supplementary-material-1.pdf]

**e-Supplement 1. Table of Demographic Presentation of the Included Studies (K = 39), Alphabetically Organized**

| Study name (author, year) | RND    |      | Comparison |        | Follow-up                  |              | EMDR                |            |      |  | Sex (F%) |
|---------------------------|--------|------|------------|--------|----------------------------|--------------|---------------------|------------|------|--|----------|
|                           | YES/NO | Arms | Yes/No     | Months | Duration of trials (weeks) | Sessions (#) | Duration of session | Age (mean) |      |  |          |
| Acarturk et al., 2016     | Yes    | 1    | Yes        | 35     | NR                         | 4.2          | NR                  | 33.3       | 79.2 |  |          |
| Arabia et al., 2011       | Yes    | 1    | Yes        | 6      | 4                          | 8            | 45 min              | NR         | NR   |  |          |
| Capezzani et al., 2013    | Yes    | 1    | No         | -      | 8                          | 8            | NR                  | 50.8       | 100  |  |          |
| Carletto et al., 2016     | Yes    | 1    | No         | -      | 12-15                      | 10           | 1 hr                | 39.5       | 75   |  |          |
| Carletto et al., 2018     | No     | 1    | No         | -      | 24                         | 24           | Per protocol        | 39.5       | 10   |  |          |
| Carlson et al., 1998      | Yes    | 2    | Yes        | 3      | 6                          | 12           | 60-75 min           | 52.7       | 0    |  |          |
| de Bont et al., 2016      | Yes    | 2    | Yes        | 6      | 8                          | 8            | 1 hr 30 min         | 40.4       | 54.5 |  |          |
| Deisenhofer et al., 2018  | No     | 2    | No         | -      | 20                         | Up to 20     | NR                  | 41.9       | 60   |  |          |
| Demirci et al., 2017      | Yes    | 1    | No         | -      | 6                          | 6            | NR                  | 27.6       | 100  |  |          |
| Deville et al., 1998      | Yes    | 2    | Yes        | 6      | 5                          | 2            | ~90 min             | NR         | 0    |  |          |
| Edmond & Rubin, 2004      | Yes    | 2    | Yes        | 3-18   | 10.4                       | 6            | 1 hr 30 min         | NR         | 100  |  |          |
| Gauhar, 2016              | Yes    | 1    | Yes        | 3      | 7                          | 6-8          | 1 hr                | 29.4       | 80   |  |          |
| Graca et al., 2014        | No     | 2    | No         | -      | 7                          | 11           | NR                  | NR         | NR   |  |          |
| Hase et al., 2018         | Yes    | 1    | No         | -      | 7.71                       | 8.5          | 1 hr                | 40.3       | 7    |  |          |
| Hase et al., 2015         | No     | 1    | No         | -      | 6.54                       | 4.6          | 1 hr                | 43.3       | 37.5 |  |          |
| Hofmann et al., 2014      | No     | 1    | No         | -      | NR                         | 6.9          | NR                  | 40.4       | 81.0 |  |          |
| Hogberg et al., 2007      | Yes    | 1    | No         | -      | 8                          | 5            | 1 hr 30 min         | 43         | 23.1 |  |          |
| Ironson et al., 2002      | Yes    | 1    | Yes        | 3      | NR                         | 3            | 1 h 30 m            | NR         | NR   |  |          |
| Karatzias et al., 2011    | Yes    | 1    | Yes        | 3      | NR                         | 3.7          | ~1 hr               | 41.5       | 60.9 |  |          |

(continued)

**e-Supplement 1. Table of Demographic Presentation of the Included Studies (K = 39), Alphabetically Organized (Continued)**

| Study name (author, year)   | RND    |      | Comparison |        | Follow-up                  |              | EMDR                |            |          |  |  |
|-----------------------------|--------|------|------------|--------|----------------------------|--------------|---------------------|------------|----------|--|--|
|                             | YES/NO | Arms | Yes/No     | Months | Duration of trials (weeks) | Sessions (#) | Duration of session | Age (mean) | Sex (F%) |  |  |
| Kohler et al., 2017         | No     | 1    | No         | -      | 4                          | 8-12         | 1-2 hr              | NR         | 7.7      |  |  |
| Lee et al., 2002            | Yes    | 1    | Yes        | 3      | 7                          | 7            | 1 hr 30 min         | 34         | NR       |  |  |
| Lehnung et al., 2017        | Yes    | 1    | No         | -      | 0.29                       | 2            | NR                  | NR         | NR       |  |  |
| Marcus, 1997                | Yes    | 1    | No         | -      | NR                         | 3            | 50 min              | NR         | NR       |  |  |
| Minelli et al., 2019        | Yes    | 1    | Yes        | 4      | 8                          | 24           | 1 hr                | 52.3       | 83.3     |  |  |
| Moghadam, 2015              | Yes    | 1    | Yes        | 12     | NR                         | 3            | 45-90 min           | NR         | 16.7     |  |  |
| Nijdam et al., 2012         | Yes    | 1    | No         | -      | 17                         | 6.5          | 1 h 30 min          | 38.3       | 61.4     |  |  |
| Novo et al., 2014           | Yes    | 1    | Yes        | 6      | 12                         | 14-18        | 1 h 30 min          | 43.9       | 70       |  |  |
| Ostacoli et al., 2018       | Yes    | 1    | Yes        | 6      | 13-26                      | 15           | NR                  | 48.2       | 80.7     |  |  |
| Power et al., 2002          | Yes    | 2    | No         | -      | 10                         | Up to 10     | 1 hr 30 min         | 38.6       | 44.4     |  |  |
| Rothbaum, 1997              | Yes    | 1    | Yes        | 3      | 4                          | 4            | 1 hr 30 min         | 31.6       | 100      |  |  |
| Rothbaum et al., 2005       | Yes    | 2    | Yes        | 6      | 4-5                        | 7            | 1 hr 30 min         | 33.8       | 100      |  |  |
| Shapiro, Laub, et al., 2018 | Yes    | 1    | Yes        | 6      | 0.43                       | 3            | 1 hr 30 min         | 41.7       | 84.6     |  |  |
| Shapiro & Laub, 2015        | Yes    | 1    | Yes        | 3      | 0.29                       | 2            | 1 hr 30 min         | 42.9       | NR       |  |  |
| Silver et al., 1995         | No     | 3    | No         | -      | 12.86                      | at least 1   | NR                  | NR         | 0        |  |  |
| Szpringer et al., 2018      | No     | 1    | No         | -      | 14                         | 10-12        | 60-90 min           | 63         | 100      |  |  |
| Tarquinio et al., 2012      | No     | 2    | Yes        | 6      | 24                         | 5            | 1 hr                | 33         | 100      |  |  |
| van der Kolk et al., 2007   | Yes    | 2    | Yes        | 6      | 8                          | 8            | 1 hr 30 min         | 38.7       | 75.9     |  |  |
| Yurtsever et al., 2018      | Yes    | 1    | Yes        | 1      | 0.43                       | 2            | ~2 hr               | 39.9       | 72.2     |  |  |
| Vaughan et al., 1994        | Yes    | 2    | Yes        | 3      | 2-3                        | 4.3          | ~50 min             | NR         | NR       |  |  |

*Note.* RND = randomized; NR = not reported.
