# Supplementary material
Source: HighWire-hosted journal article supplement (https://connect.springerpub.com/content/15/1/2)
Supplement: inline-supplementary-material-2 [file inline-supplementary-material-2.pdf]

**e-Supplement 2. List of Excluded Studies With Reasons**

| <b>Author</b>                        | <b>Date</b> | <b>Reasons for Exclusion</b>                                                          |
|--------------------------------------|-------------|---------------------------------------------------------------------------------------|
| Asayesh & Narimani                   | 2016        | Authenticity issue                                                                    |
| Banerjee & Argaez                    | 2017        | Meta-analysis                                                                         |
| Benor, Rossiter-Thornton & Toussaint | 2017        | Hybrid treatment (technique derived from EMDR)                                        |
| Brewin et al.                        | 2010        | No comparison group                                                                   |
| Forbes, Creamer & Rycroft            | 1994        | No comparison group (case series)                                                     |
| Gerardi, Rothbaum, Astin & Kelley    | 2010        | No depression mean score                                                              |
| Haagen et al.                        | 2016        | No data                                                                               |
| Hogberg et al.                       | 2007        | No comparison group                                                                   |
| Jayawickreme et al.                  | 2014        | Pooled meta-analysis (double checked for data)                                        |
| Marcus, Marquis & Sakai              | 2004        | Follow-up study only (old data from 1997 article)                                     |
| Mazzola et al.                       | 2009        | No comparison group                                                                   |
| Raboni et al.                        | 2014        | No comparison with other treatment                                                    |
| Renner, Banninger-Huber & Peltzer    | 2011        | No depression subscale                                                                |
| Rost, Hofman & Wheeler               | 2009        | No comparison group (case series)                                                     |
| Scheck et al.                        | 1998        | Mixed sample (16–25 years of age)                                                     |
| Schneider, Hofman, Rost & Shapiro    | 2008        | No comparison group (case series)                                                     |
| Schubert et al.                      | 2016        | No comparison group                                                                   |
| Silver, Rogers, Knipe & Colleli      | 2005        | No depression measure or comparison group                                             |
| Staring et al.                       | 2016        | Crossover design of EMDR and competitive memory training                              |
| Steinert et al.                      | 2017        | No EMDR (resource activation treatment)                                               |
| Tapia et al.                         | 2018        | No comparison group and different EMDR modality (schema therapy associated with EMDR) |
| Tarquinio et al.                     | 2012        | No comparison group (case series)                                                     |
| Van den Berg, de Bont et al.         | 2018        | No comparison group                                                                   |
