# Supplementary material
Source: HighWire-hosted journal article supplement (https://connect.springerpub.com/content/15/1/2)
Supplement: inline-supplementary-material-4 [file inline-supplementary-material-4.pdf]

#### e-Supplement 4. Cochrane Risk-of-Bias Tool for Randomized Trials

| Study Name (author, year)   | Randomization Process | Deviations From Intended Interventions | Missing Outcome Data | Measurement of the Outcome | Selection of the Reported Result | Overall Bias | z-Score |
|-----------------------------|-----------------------|----------------------------------------|----------------------|----------------------------|----------------------------------|--------------|---------|
| (Acarturk et al., 2016)     | Low                   | Low                                    | Low                  | Low                        | Low                              | Low          | 0       |
| (Arabia et al., 2011)       | Low                   | Low                                    | Low                  | Low                        | Low                              | Low          | 0       |
| (Capezzani et al., 2013)    | Low                   | Low                                    | Low                  | Low                        | Low                              | Low          | 0       |
| (Carletto et al., 2016)     | Low                   | Low                                    | Low                  | Low                        | Low                              | Low          | 0       |
| (Carlson et al., 1998)      | Low                   | Low                                    | Low                  | Low                        | Low                              | Low          | 0       |
| (de Bont et al., 2016)      | Low                   | Low                                    | Low                  | Low                        | Low                              | Low          | 0       |
| (Demirci et al., 2017)      | Low                   | Low                                    | Low                  | Low                        | Low                              | Low          | 0       |
| (Deville et al., 1998)      | Low                   | Low                                    | Low                  | Low                        | Low                              | Low          | 0       |
| (Edmond & Rubin, 2004)      | Low                   | Low                                    | Low                  | Low                        | Low                              | Low          | 0       |
| (Gauhar, 2016)              | Low                   | Low                                    | Low                  | Low                        | Low                              | Low          | 0       |
| (Hase et al., 2018)         | Low                   | Low                                    | Low                  | Low                        | Low                              | Low          | 0       |
| (Hogberg et al., 2007)      | Low                   | Low                                    | Low                  | Low                        | Low                              | Low          | 0       |
| (Ironson et al., 2002)      | Low                   | Low                                    | Low                  | Low                        | Low                              | Low          | 0       |
| (Karatzias et al., 2011)    | Low                   | Low                                    | Low                  | Low                        | Low                              | Low          | 0       |
| (Kohler et al., 2017)       | Low                   | Low                                    | Low                  | Low                        | Low                              | Low          | 0       |
| (Lee et al., 2002)          | Low                   | Low                                    | Low                  | Low                        | Low                              | Low          | 0       |
| (Lehnung et al., 2017)      | Low                   | Low                                    | Low                  | Low                        | Low                              | Low          | 0       |
| (Marcus, 1997)              | Low                   | Low                                    | Low                  | Low                        | Low                              | Low          | 0       |
| (Minelli et al., 2019)      | Low                   | Low                                    | Low                  | Low                        | Low                              | Low          | 0       |
| (Moghadam, 2015)            | Low                   | Low                                    | Low                  | Low                        | Low                              | Low          | 0       |
| (Nijdam et al., 2012)       | Low                   | Low                                    | Low                  | Low                        | Low                              | Low          | 0       |
| (Novo et al., 2014)         | Low                   | Low                                    | Low                  | Low                        | Low                              | Low          | 0       |
| (Ostacoli et al., 2018)     | Low                   | Low                                    | Low                  | Low                        | Low                              | Low          | 0       |
| (Power et al., 2002)        | Low                   | Low                                    | Low                  | Low                        | Low                              | Low          | 0       |
| (Rothbaum, 1997)            | Low                   | Low                                    | Low                  | Low                        | Low                              | Low          | 0       |
| (Rothbaum et al., 2005)     | Low                   | Low                                    | Low                  | Low                        | Low                              | Low          | 0       |
| (Shapiro, 2018a)            | Low                   | Low                                    | Low                  | Low                        | Low                              | Low          | 0       |
| (Shapiro & Laub, 2015)      | Low                   | Low                                    | Low                  | Low                        | Low                              | Low          | 0       |
| (van der Kolk et al., 2007) | Low                   | Low                                    | Low                  | Low                        | Low                              | Low          | 0       |
| (Yurtsever et al., 2018)    | Low                   | Low                                    | Low                  | Low                        | Low                              | Low          | 0       |
| (Vaughan et al., 1994)      | Low                   | Low                                    | Low                  | Low                        | Low                              | Low          | 0       |

**Note.** We quantified each qualitative rating with a score, low = 3, medium = 2, and high risk of bias = 1; calculated a sum score and then generated a z-score.
