# Supplementary material
Source: HighWire-hosted journal article supplement (https://connect.springerpub.com/content/15/1/2)
Supplement: inline-supplementary-material-5 [file inline-supplementary-material-5.pdf]

**e-Supplement 5. NOS for Nonrandomized Studies**

| Study name (author, year)  | Selection |    |    |    | Comparability |     | Outcome |   |   | Total score | z-Score |
|----------------------------|-----------|----|----|----|---------------|-----|---------|---|---|-------------|---------|
|                            | S1        | S2 | S3 | S4 | C1a           | C1b | 1       | 2 | 3 |             |         |
| (Carletto et al., 2018)    | *         | *  | *  | *  | *             | *   | *       | 0 | 0 | 7           | 1.20    |
| (Deisenhofer et al., 2018) | *         | *  | *  | *  | *             | *   | *       | 0 | 0 | 7           | 1.20    |
| (Graca et al., 2014)       | *         | *  | *  | *  | *             | *   | *       | 0 | 0 | 7           | 1.20    |
| (Hase et al., 2015)        | *         | *  | *  | *  | *             | *   | *       | * | 0 | 8           | 2.20    |
| (Hofmann et al., 2014)     | *         | *  | *  | *  | *             | *   | *       | 0 | 0 | 7           | 1.20    |
| (Kohler et al., 2017)      | 0         | *  | *  | *  | *             | *   | *       | 0 | 0 | 6           | 0.20    |
| (Silver et al., 1995)      | 0         | *  | *  | *  | *             | *   | 0       | 0 | 0 | 5           | -1.80   |
| (Szpringer et al., 2018)   | 0         | *  | *  | *  | *             | *   | *       | 0 | 0 | 6           | 0.20    |
| (Tarquinio, 2012)          | *         | *  | *  | *  | *             | *   | *       | 0 | 0 | 7           | 1.20    |

*Note.* We quantified each \* with 1 point, calculated a sum score and then generated a z-score.
