# Supplementary material
Source: HighWire-hosted journal article supplement (https://connect.springerpub.com/content/15/1/2)
Supplement: inline-supplementary-material-6 [file inline-supplementary-material-6.pdf]

**e-Supplement 6. Table of Control Types of the Included Studies (K = 39), Alphabetically Organized**

| Study name<br>(author)  | Year | Type of Control                                                                     | Depression            |        | Original Condition       | Country of Data | Medication Allowed |                    | Quality Rating (%) |
|-------------------------|------|-------------------------------------------------------------------------------------|-----------------------|--------|--------------------------|-----------------|--------------------|--------------------|--------------------|
|                         |      |                                                                                     | Primary/<br>Secondary | Yes/No |                          |                 | Yes/No             | Quality Rating (%) |                    |
|                         |      |                                                                                     |                       |        |                          |                 |                    |                    |                    |
| Acarturk et al.         | 2016 | Wait-list                                                                           | 2                     |        | PTSD                     | Turkey-Syria    | No                 | 91                 |                    |
| Arabia, Manca & Solomon | 2011 | Imaginal prolonged exposure therapy                                                 | 2                     |        | Cardiac - PTSD           | Italy           | NS                 | 84                 |                    |
| Capezzani et al.        | 2013 | CBT                                                                                 | 2                     |        | Cancer - PTSD            | Italy           | No                 | 84                 |                    |
| Carletto, et al.        | 2016 | Relaxation therapy                                                                  | 2                     |        | MS - PTSD                | Italy           | Yes                | 91                 |                    |
| Carletto, et al.        | 2018 | Treatment as usual                                                                  | 2                     |        | Addiction                | Italy           | Yes                | 84                 |                    |
| Carlson et al.          | 1998 | Wait-list/Biofeedback-assisted relaxation                                           | 2                     |        | PTSD                     | United States   | NS                 | 81                 |                    |
| de Bont et al.          | 2016 | Wait-list/Prolonged exposure                                                        | 2                     |        | PTSD                     | Netherlands     | NS                 | 91                 |                    |
| Deisenhofer et al.      | 2018 | Trauma focused-CBT/Trauma focused-CBT (PAI treatment-specific predictors)           | 2                     |        | PTSD                     | Germany         | Yes                | 91                 |                    |
| Demirci et al.          | 2017 | Duloxetine                                                                          | 2                     |        | Somatic symptom disorder | Turkey          | No                 | 88                 |                    |
| Devilly et al.          | 1998 | Reactive eye-dilation desensitization and reprocessing/Standard psychiatric support | 2                     |        | PTSD                     | Australia       | Yes                | 84                 |                    |
| Edmond & Rubin          | 2004 | Treatment as usual/Wait-list (delayed treatment)                                    | 2                     |        | Sexual abuse             | United States   | No                 | 88                 |                    |
| Gauhar                  | 2016 | Wait-list                                                                           | 1                     |        | Depression               | Pakistan        | No                 | 81                 |                    |
| Graca et al.            | 2014 | Group cognitive processing therapy/Trauma group exposure therapy                    | 2                     |        | PTSD                     | United States   | NS                 | 84                 |                    |
| Hase et al.             | 2018 | Treatment as usual                                                                  | 1                     |        | Depression               | Germany         | Yes                | 84                 |                    |
| Hase et al.             | 2015 | Treatment as usual                                                                  | 1                     |        | Depression               | Germany         | Yes                | 88                 |                    |
| Hofmann et al.          | 2014 | CBT                                                                                 | 1                     |        | Unipolar Depression      | Germany         | Yes                | 84                 |                    |
| Hogberg et al.          | 2007 | Wait-list                                                                           | 2                     |        | PTSD                     | Sweden          | Yes                | 88                 |                    |
| Ironson                 | 2002 | Prolonged exposure                                                                  | 2                     |        | PTSD                     | United States   | NS                 | 84                 |                    |

(continued)

**e-Supplement 6. Table of Control Types of the Included Studies (K = 39), Alphabetically Organized (Continued)**

| Study name (author) | Year | Type of Control                                     | Depression        |        | Original Condition     | Country of Data | Medication Allowed |        | Quality Rating (%) |
|---------------------|------|-----------------------------------------------------|-------------------|--------|------------------------|-----------------|--------------------|--------|--------------------|
|                     |      |                                                     | Primary/Secondary | Yes/No |                        |                 | Yes/No             | Yes/No |                    |
|                     |      |                                                     |                   |        |                        |                 |                    |        |                    |
| Karatzias et al.    | 2011 | EFT                                                 | 2                 |        | PTSD                   | Scotland        | Yes                | Yes    | 88                 |
| Kohler et al.       | 2017 | Wait-list                                           | 2                 |        | PTSD                   | Germany         | NS                 | NS     | 91                 |
| Lee et al.          | 2002 | Stress inoculation training with prolonged exposure | 2                 |        | PTSD                   | Australia       | NS                 | NS     | 84                 |
| Lehning et al.      | 2017 | Wait-list                                           | 2                 |        | PTSD-Symptom           | Germany         | NS                 | NS     | 88                 |
| Marcus et al.       | 1997 | Standard care                                       | 2                 |        | PTSD                   | United States   | Yes                | Yes    | 88                 |
| Minelli et al.      | 2019 | Trauma focused-CBT                                  | 1                 |        | Depression             | Italy           | Yes                | Yes    | 88                 |
| Moghadam et al.     | 2015 | No intervention                                     | 2                 |        | MI-Depression          | Iran            | No                 | No     | 75                 |
| Nijdam et al.       | 2012 | Brief eclectic therapy                              | 2                 |        | PTSD                   | Netherlands     | Yes                | Yes    | 91                 |
| Novo et al.         | 2014 | Treatment as usual                                  | 2                 |        | Sub-syndromal Bipolar  | Spain           | Yes                | Yes    | 91                 |
| Ostacoli et al.     | 2018 | CBT+ADM                                             | 1                 |        | Depression             | Italy           | Yes                | Yes    | 91                 |
| Power et al.        | 2002 | Wait-list/Exposure + cognitive-restructuring        | 2                 |        | PTSD                   | United Kingdom  | yes                | yes    | 88                 |
| Rothbaum            | 1997 | Wait-list                                           | 2                 |        | PTSD                   | United States   | NS                 | NS     | 84                 |
| Rothbaum et al.     | 2005 | Wait-list/Prolonged exposure                        | 2                 |        | PTSD                   | United States   | No                 | No     | 84                 |
| Shapiro et al.      | 2018 | Wait-list (delayed treatment)                       | 2                 |        | PTS                    | Israel          | NS                 | NS     | 88                 |
| Shapiro & Laub      | 2015 | Wait-list (delayed treatment)                       | 2                 |        | PTS                    | Israel          | NS                 | NS     | 91                 |
| Silver et al.       | 1995 | Wait-list/Relaxation/ Biofeedback                   | 2                 |        | PTSD                   | United States   | NS                 | NS     | 59                 |
| Szpringer et al.    | 2018 | Standard medical care                               | 2                 |        | Glioblastoma           | Poland          | No                 | No     | 88                 |
| Tarquino et al.     | 2012 | Wait-list/Eclectic therapy                          | 2                 |        | PTSD-Domestic violence | France          | Yes                | Yes    | 84                 |
| van der Kolk et al. | 2007 | Pill placebo/Fluoxetine                             | 2                 |        | PTSD                   | United States   | No                 | No     | 84                 |
| Vaughan et al.      | 1994 | AMR/IHT                                             | 2                 |        | PTSD                   | Australia       | NS                 | NS     |                    |
| Yurtsever et al.    | 2018 | Wait-list                                           | 2                 |        | PTSD                   | Turkey-Syria    | No                 | No     | 88                 |

**Note.** ADM = antidepressant medication; AMR = applied muscle relaxation; CBT = cognitive behavioral therapy; EFT = emotion freedom technique; IHT = image habituation training; MS = multiple sclerosis; NS = not specified; PAI = personalized advantage index; PTSD = posttraumatic stress disorder; PTS = posttraumatic stress.
