# Supplementary material
Source: HighWire-hosted journal article supplement (https://connect.springerpub.com/content/15/1/2)
Supplement: inline-supplementary-material-7 [file inline-supplementary-material-7.pdf]

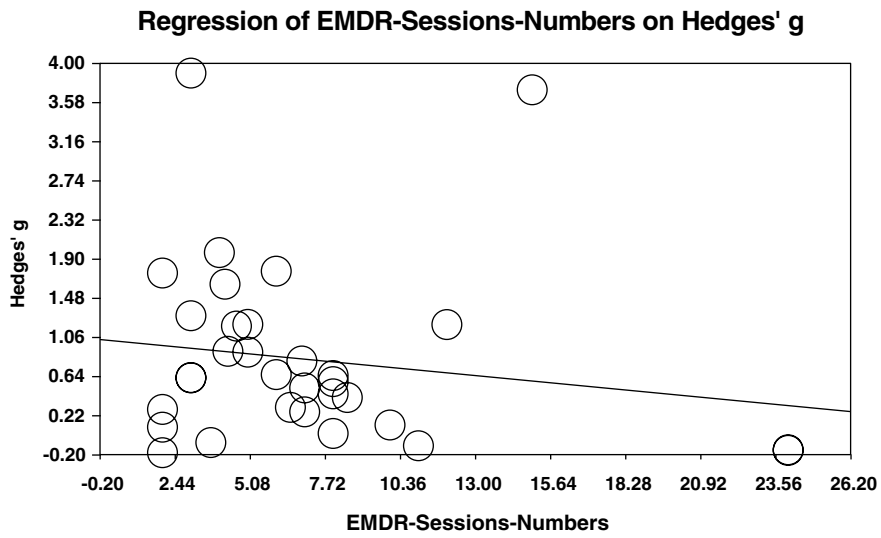

Meta-regression showing the weight of number of sessions on treatment effect for studies (K=32) reporting exact average values.

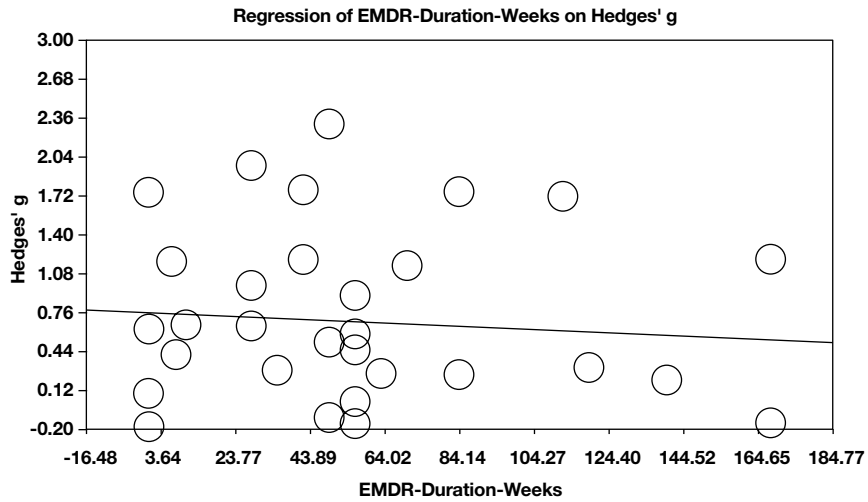

Meta-regression showing the weight of duration of trials (in weeks) on treatment effect for studies (K=30) reporting exact values.

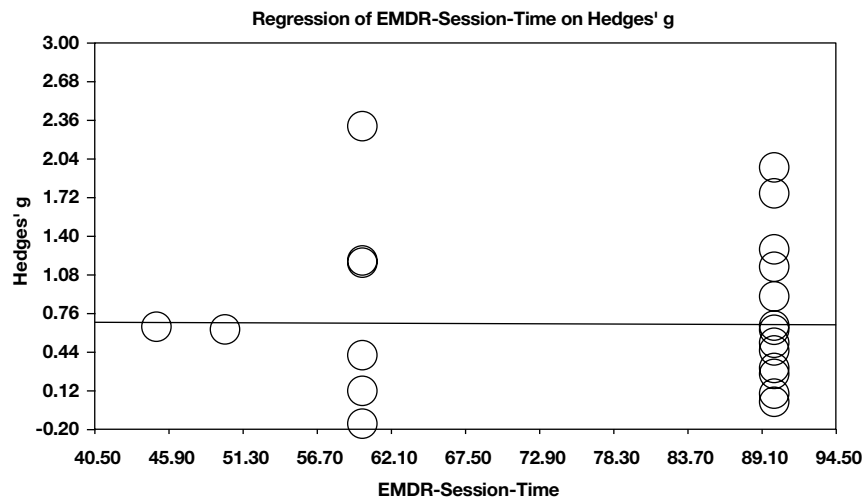

Meta-regression showing the weight of session duration (in minutes) on treatment effect for studies (K=21) reporting exact values.

**e-Supplement 7.** Meta-regressions – sessions' numbers, session time, duration of trials.
